# Supplementary material for: Consumer-friendly food allergen detection: moving towards smartphone-based immunoassays
Source: Springer Nature journal article supplement (doi:10.1007/s00216-018-0989-7), 2018-03-26
Supplement: 216_2018_989_MOESM1_ESM.pdf [file 216_2018_989_MOESM1_ESM.pdf]

## **Analytical and Bioanalytical Chemistry**

### **Electronic Supplementary Material**

#### **Consumer-friendly food allergen detection: moving towards smartphone based immunoassays**

Georgina M. S. Ross, Monique G. E. G. Bremer, Michel W. F. Nielen

## Contents

|                                                                                                            |    |
|------------------------------------------------------------------------------------------------------------|----|
| Table S1 Food allergens requiring labelling in different countries .....                                   | 3  |
| Table S2 Proof-of-concept Multiplex Allergen Assays .....                                                  | 4  |
| Table S3 Commercially Available Food Allergen Assays .....                                                 | 7  |
| Table S4 Conventionally lab-based allergen detection methods and their smartphone-based counterparts ..... | 34 |
| References .....                                                                                           | 36 |

**Table S1** Food allergens requiring labelling in different countries

|                  | EU | Canada | USA | Australia/New Zealand | China | Hong Kong | Japan | Korea | Taiwan | Argentina | Thailand | Bolivia | Brazil | Chile | Colombia | Costa Rica | Cuba | Mexico | Nicaragua | South Africa | Venezuela |   |
|------------------|----|--------|-----|-----------------------|-------|-----------|-------|-------|--------|-----------|----------|---------|--------|-------|----------|------------|------|--------|-----------|--------------|-----------|---|
| Milk             | X  | X      | X   | X                     | X     | X         | X     | X     | X      | X         | X        | X       | X      | X     | X        | X          | X    | X      | X         | X            | X         | X |
| Eggs             | X  | X      | X   | X                     | X     | X         | X     | X     | X      | X         | X        | X       | X      | X     | X        | X          | X    | -      | X         | X            | X         | X |
| Cereal/<br>Wheat | X  | X      | X   | X                     | X     | X         | X     | -     | -      | -         | X        | -       | -      | X     | X        | X          | X    | X      | X         | X            | X         | X |
| Peanut           | X  | X      | X   | X                     | X     | X         | X     | X     | X      | X         | X        | X       | X      | X     | X        | X          | X    | X      | X         | X            | X         | X |
| Tree Nuts        | X  | X      | X   | X                     | X     | X         | -     | -     | X      | X         | X        | X       | X      | X     | X        | X          | X    | X      | X         | X            | X         | X |
| Fish             | X  | X      | X   | X                     | -     | X         | -     | -     | X      | X         | X        | X       | X      | X     | X        | X          | X    | X      | X         | X            | X         | X |
| Crustacean       | X  | X      | X   | X                     | X     | X         | X     | X     | X      | X         | X        | X       | X      | X     | X        | X          | X    | X      | X         | X            | X         | X |
| Soy              | X  | X      | X   | X                     | X     | X         | -     | -     | X      | X         | X        | X       | X      | X     | X        | X          | X    | X      | X         | X            | X         | X |
| Celery           | X  | -      | -   | -                     | -     | -         | -     | -     | -      | -         | -        | -       | -      | -     | -        | -          | -    | -      | -         | -            | -         | - |
| Mustard          | X  | X      | -   | -                     | -     | -         | -     | -     | -      | -         | -        | -       | -      | -     | -        | -          | -    | -      | -         | -            | -         | - |
| Lupin            | X  | -      | -   | -                     | -     | -         | -     | -     | -      | -         | -        | -       | -      | -     | -        | -          | -    | -      | -         | -            | -         | - |
| Sesame           | X  | X      | -   | X                     | -     | -         | -     | -     | -      | -         | -        | -       | -      | -     | -        | -          | -    | -      | -         | -            | -         | - |
| Sulphites        | X  | X      | -   | -                     | -     | -         | -     | -     | X      | X         | X        | X       | X      | X     | X        | X          | -    | X      | X         | -            | X         |   |
| Other            | -  | -      | -   | -                     | X     | -         | X     | X     | X      | X         | -        | X       | -      | -     | -        | -          | -    | -      | -         | -            | -         | - |

**Table S2** Proof-of-concept Multiplex Allergen Assays

| Assay Format                             | Allergens Detected                                                                                                                 | Label Used                                               | Extraction Buffer                                                                                                                 | LOD                          | Ref |
|------------------------------------------|------------------------------------------------------------------------------------------------------------------------------------|----------------------------------------------------------|-----------------------------------------------------------------------------------------------------------------------------------|------------------------------|-----|
| iSPR                                     | Peanut, hazelnut, soy, casein, egg, pine nut, macadamia nut, brazil nut, cashew, pistachio & pecan.                                | Label free                                               | RIDASCREEN allergen extraction buffer (R-Biopharm AG)                                                                             | 0.4-4.6 mg/kg                | [1] |
| Compact Disc Immunoassay                 | Gliadin, casein, B-lactoglobulin & ovalbumin                                                                                       | Gold nanoparticle amplified by silver enhancement method | 40% ethanol in PBST (pH 7.5)                                                                                                      | 0.04-0.16 mg L <sup>-1</sup> | [2] |
| Reverse dot blot immunoassay             | Peanut, hazelnut & brazil nut                                                                                                      | Biotin                                                   | PBS with 0.1% (v/v) tween 20 & 4.0% (w/v) skimmed milk powder                                                                     | 0.01-0.02 mg/kg              | [3] |
| Microfluidics ELISA-based optical sensor | Ara h1 & Gluten                                                                                                                    | Horseradish peroxidase                                   | Extraction buffers provided in ELISA kits (Indoor Biotechnologies for Ara h1 and Crystal Chem for Gluten)                         | 4.77-15.2 ng/mL              | [4] |
| Sandwich assay format optical biosensor  | Milk, egg, hazelnut, peanut, shellfish & sesame                                                                                    | Label Free                                               | 20mM TRIS pH 8.7, 150mM NaCl                                                                                                      | 1-12.5 µg/kg                 | [5] |
| Flow Cytometry                           | Casein, soy & gluten                                                                                                               | Coloured super-paramagnetic carboxylated microbeads      | 2-ME in guadine HCl in PBS                                                                                                        | Not Specified                | [6] |
| Flow Cytometry                           | Crustacean, peanut, egg, milk & mustard                                                                                            | Coloured super-paramagnetic carboxylated microbeads      | PBS (pH 7.5) NaCl (50mM), Na <sub>2</sub> HPO <sub>4</sub> (40mM), KH <sub>2</sub> PO <sub>4</sub> (5mM) & NaN <sub>3</sub> (1mM) | 2-10 mg/kg                   | [7] |
| Flow Cytometry                           | Crustacean, egg, gluten, milk, peanut, soy, almond, brazil nut, cashew, coconut, hazelnut, macadamia, pine nut, pistachio & walnut | Coloured super-paramagnetic carboxylated microbeads      | PBS-T (nondenatured) and 0.5% SDS/2% B-mercaptoethanol (denatured)                                                                | 5 ng/mL                      | [8] |
| Flow Cytometry                           | Soy, pea & soluble wheat proteins                                                                                                  | Coloured super-paramagnetic                              | 20mL PBS (pH 7.4)                                                                                                                 | 0.5-0.6 µg/mL                | [9] |

|                                             |                                                                                  |                                                             |                                                                                                                                                        |                        |      |
|---------------------------------------------|----------------------------------------------------------------------------------|-------------------------------------------------------------|--------------------------------------------------------------------------------------------------------------------------------------------------------|------------------------|------|
|                                             |                                                                                  | carboxylated microbeads (using red and orange fluorophores) |                                                                                                                                                        |                        |      |
| Optical thin film biochips                  | Mustard, lupine, walnut, hazelnut, celery, almond, oat & sesame                  | Label Free                                                  | CTAB extraction buffer (2% CTAB, 1.4 mol/l NaCl, 0.1 mol/l Tris/HCl, 20 mmol/l Na <sub>2</sub> EDTA pH 8.0)                                            | 0.001%                 | [10] |
| DNA Microarray on a DVD                     | Hazelnut, peanut & soybean                                                       | Label Free                                                  | CTAB extraction with 10uL RNase and 10uL proteinase K & column purification                                                                            | 1 µg/g (0.0001%)       | [11] |
| Decaplex PCR with capillary electrophoresis | Hazelnut, peanut, pistachio, oat, sesame, cashew, barley, wheat, soybean & pecan | Label Free                                                  | Plant genomic DNA isolation kit; and 1.0% agarose gel for electrophoresis                                                                              | 0.005%                 | [12] |
| Tetraplex real-time PCR                     | Soy bean, celery, white mustard & brown mustard                                  | Fluorophore                                                 | CTAB extraction buffer 20 g/L, 1.4 mol/L sodium chloride, 0.1 mol/L TRIS, 0.02 mol/L Na <sub>2</sub> EDTA (99+%) pH 8.0 and 60uL proteinase K          | 2.6-36.8 mg/kg         | [13] |
| Real time PCR                               | Mustard, celery, wheat & rye                                                     | Fluorophore                                                 | CTAB extraction buffer & incubation with proteinase K lysates centrifuged & purified with chloroform & isoamyl alcohol                                 | 5-40 mg/kg             | [14] |
| Real time PCR                               | Sesame, almond, lupine & brazil nut                                              | Fluorophore                                                 | CTAB extraction with precipitation step                                                                                                                | 10 mg/kg               | [15] |
| Real time PCR                               | Citrus Fruits                                                                    | Fluorophore                                                 | Trizol to extract RNA. DNA digested with DNase1. Total RNA reverse transcribed with random hexamers using Prime-Script first strand cDNA synthesis kit | 20 fg DNA per PCR tube | [16] |
| Real time PCR                               | Almonds, hazelnuts, cashews, peanuts & sesame seeds                              | Fluorophore; SYBR <sup>®</sup> GreenER <sup>™</sup>         | CTAB extraction                                                                                                                                        | 0.5-5 pg of DNA        | [17] |

|                                                         |                                                                                                      |                                                                                    |                                                                                                            |                            |      |
|---------------------------------------------------------|------------------------------------------------------------------------------------------------------|------------------------------------------------------------------------------------|------------------------------------------------------------------------------------------------------------|----------------------------|------|
| One step PCR                                            | Brazil nut & pecan                                                                                   | Not stated                                                                         | DNeasy plant mini kit column                                                                               | 0.1%                       | [18] |
| Multiplex ligation dependent probe amplification (MLPA) | Sunflower seed, poppy seed, flaxseed, sesame & soy                                                   | Fluorophore                                                                        | Wizard DNA clean-up system kit                                                                             | 10 mg/kg                   | [19] |
| Multiplex ligation dependent probe amplification (MLPA) | Sesame, soy, hazelnut, peanut, lupine, gluten, mustard & celery                                      | Fluorophore                                                                        | DNeasy plant mini kit column                                                                               | 0.001%                     | [20] |
| Multiplex ligation dependent probe amplification (MLPA) | Peanut, cashew, pecan, pistachio, hazelnut, sesame seeds, macadamia nut, almond, walnut & brazil nut | Fluorophore                                                                        | CTAB extraction: 2% CTAB, 1.4 M NaCl, 20mm EDTA, 100mM TRIS-OH/HCl and 30µl proteinase K at 65°C overnight | 5 mg/kg <sup>-1</sup>      | [21] |
| Multiplex ligation dependent probe amplification (MLPA) | Scallop, fish, gastropod, crustacean, cephalopod & bivalve                                           | Fluorophore                                                                        | CTAB: 2% CTAB, 1.4 M NaCl, 0.1 M TRIS & 20mm EDTA & proteinase K solution at 65 °c overnight               | 20-100 mg/kg <sup>-1</sup> | [22] |
| Giant magneto-resistive sensor array                    | Peanut (Ara h1 & Ara h2) & gliadin                                                                   | Streptavidin conjugated to magnetic microbeads and biotinylated detection antibody | N/A                                                                                                        | 0.2-7 ng/mL                | [23] |

**Table S3** Commercially Available Food Allergen Assays

| <b>Allergenic Food</b> | <b>Product</b>                      | <b>Target</b>                                           | <b>Assay Format</b>   | <b>LOD/LOQ</b>                                                                     | <b>Time (min)</b> | <b>Company</b> |
|------------------------|-------------------------------------|---------------------------------------------------------|-----------------------|------------------------------------------------------------------------------------|-------------------|----------------|
| Cereals with Gluten    | RIDASCREEN<br>Gluten                | Gliadin/gluten                                          | Sandwich<br>ELISA     | 0.5mg/kg gliadin; 1.0mg/kg gluten                                                  | 90                | R-Biopharm AG  |
|                        | RIDASCREEN<br>FAST Gluten           | Gliadin/gluten                                          | Sandwich<br>ELISA     | 0.5 mg/kg gliadin; 1.0 mg/kg gluten                                                | 30                | R-Biopharm AG  |
|                        | RIDASCREEN<br>Gluten<br>Competitive | Gliadin/gluten                                          | Competitive<br>ELISA  | 2.3 mg/kg gliadin; 4.6 mg/kg gluten                                                | 40                | R-Biopharm AG  |
|                        | RIDAQUICK<br>Gluten                 | Gliadin/gluten                                          | Lateral Flow<br>Strip | 1.3 µg/100cm <sup>2</sup> gliadin on surfaces; 2.2 mg/kg gliadin; 3.1 mg/kg gluten | 5                 | R-Biopharm AG  |
|                        | Gliadin/Gluten<br>ELISA             | Gliadin/gluten/wheat/barley                             | Sandwich<br>ELISA     | 0.3 mg/kg                                                                          | 60                | Immunolab      |
|                        | Gliadin<br>ESGLISS-48               | Gliadin                                                 | Sandwich<br>ELISA     | 2.0-20 mg/kg                                                                       | Not Stated        | ELISA Systems  |
|                        | VERATOX for<br>Gliadin              | Prolamins (wheat gliadin, rye secalin & barley hordein) | Sandwich<br>ELISA     | 5 mg/kg                                                                            | 30                | Neogen         |

|  |                           |                                                                                                          |                                                   |                                                                 |    |        |
|--|---------------------------|----------------------------------------------------------------------------------------------------------|---------------------------------------------------|-----------------------------------------------------------------|----|--------|
|  | VERATOX for<br>Gliadin R5 | Prolamins (wheat gliadin,<br>rye secalin & barley hordein)<br><br>in finished food and clean in<br>rinse | Sandwich<br><br>ELISA                             | 2.5 mg/kg                                                       | 30 | Neogen |
|  | REVEAL 3-D for<br>Gliadin | Gliadin                                                                                                  | Lateral Flow<br><br>Strip (with<br>overflow line) | 5 mg/kg; (10ppm gluten); 2 µg/100cm <sup>2</sup><br><br>gliadin | 5  | Neogen |
|  | REVEAL 3-D for<br>Gluten  | Gluten                                                                                                   | Lateral Flow<br><br>Strip (with<br>overflow line) | 5-10 mg/kg; 80 µg/100cm <sup>2</sup> swab                       | 5  | Neogen |
|  | ALERT for<br>Gliadin      | Gliadin/gluten                                                                                           | Sandwich<br><br>ELISA                             | 10mg/kg gliadin; 20mg/kg gluten                                 | 30 | Neogen |
|  | ALERT for<br>Gliadin R5   | Gliadin/gluten in processed<br>foods/CIP/environmental<br>surfaces                                       | Sandwich<br><br>ELISA                             | 10 mg/kg gliadin; 20 mg/kg gluten                               | 30 | Neogen |
|  | PROTEON for<br>Gluten     | Gliadin/gluten                                                                                           | Sandwich<br><br>ELISA                             | LOD: 2.5 mg/kg LOQ: 8.9 mg/kg                                   | 90 | Zeulab |
|  | PROTEON<br>EXPRESS for    | Gliadin/gluten                                                                                           | Lateral Flow<br><br>Strip                         | 3 mg/kg                                                         | 10 | Zeulab |



|  |                                   |                                                              |                    |                                     |            |                         |
|--|-----------------------------------|--------------------------------------------------------------|--------------------|-------------------------------------|------------|-------------------------|
|  | Gluten                            |                                                              |                    |                                     |            |                         |
|  | EZ™ Gluten                        | Prolamins & Glutelins of wheat, rye, barley & related grains | Lateral Flow Strip | 10 mg/kg                            | 17         | ELISA Technologies Inc. |
|  | ALLER-TEK™ Gluten ELISA           | Prolamins & Glutelins of wheat, rye, barley & related grains | Sandwich ELISA     | 5 mg/kg                             | 160        | ELISA Technologies Inc. |
|  | Gluten (Gliadin) ELISA Kit        | Gluten, Wheat                                                | Sandwich ELISA     | 0.26 mg/kg gluten; 0.31 mg/kg wheat | Not Stated | Crystal Chem            |
|  | Gluten (Gliadin) Lateral Flow Kit | Gluten, Wheat                                                | Lateral Flow Strip | 5 mg/kg wheat; 4 mg/kg gluten       | 15         | Crystal Chem            |
|  | Agrastrip® Gluten                 | Gluten                                                       | Lateral Flow Strip | 4 mg/kg                             | 11         | Romer Labs              |
|  | AgraQuant® Gluten                 | Gluten                                                       | Sandwich ELISA     | 2 mg/kg                             | 60         | Romer Labs              |
|  | Agrastrip® Gluten G12             | Gluten                                                       | Lateral Flow Strip | 3 mg/kg                             | 11         | Romer Labs              |
|  | AgraQuant® Gluten G12             | Gluten                                                       | Sandwich ELISA     | 0.6 mg/kg                           | 60         | Romer Labs              |

|          |                               |                                        |                       |                                                                                         |     |                          |
|----------|-------------------------------|----------------------------------------|-----------------------|-----------------------------------------------------------------------------------------|-----|--------------------------|
|          | Monotrace Gluten<br>ELISA     | Gluten/Gliadin                         | Sandwich<br>ELISA     | LOD: Gluten; 0.3mg/kg; Gliadin: 0.15<br>mg/kg LOQ: Gluten: 2 mg/kg; Gliadin: 1<br>mg/kg | 40  | BioFront<br>Technologies |
|          | GlutenTox Home                | Gluten                                 | Lateral Flow<br>Strip | 5 mg/kg                                                                                 | <20 | Biomedal<br>Diagnostics  |
|          | GlutenTox Pro                 | Gluten (wheat, barley, rye<br>and OAT) | Lateral Flow<br>Strip | 5 mg/kg                                                                                 | <20 | Biomedal<br>Diagnostics  |
|          | GlutenTox Sticks<br>Plus      | Gluten (G12 antibody)                  | Lateral Flow<br>Strip | 3 mg/kg                                                                                 | <20 | Biomedal<br>Diagnostics  |
|          | GlutenTox ELISA               | Gluten                                 | Sandwich<br>ELISA     | 0.6 mg/kg                                                                               | 150 | Biomedal<br>Diagnostics  |
|          | GlutenTox ELISA               | Gluten (in hydrolysed foods)           | Competitive<br>ELISA  | 3 mg/kg                                                                                 | 90  | Biomedal<br>Diagnostics  |
|          | Gluten-Tec®<br>ELISA (5171GT) | Gliadin                                | Competitive<br>ELISA  | 3.6 mg/kg                                                                               | 30  | EuroProxima              |
| Soybeans | RIDASCREEN<br>FAST Soy        | Soy protein                            | Sandwich<br>ELISA     | 0.24 mg/kg                                                                              | 30  | R-Biopharm AG            |
|          | RIDAQUICK Soy                 | Soya on Surfaces                       | Lateral Flow<br>Strip | 0.5 µg soya protein/100cm <sup>2</sup>                                                  | 16  | R-Biopharm AG            |

|  |                     |                                        |                                         |                                       |            |                       |
|--|---------------------|----------------------------------------|-----------------------------------------|---------------------------------------|------------|-----------------------|
|  | VERATOX for Soy     | Soy in processed foods, drinks and CIP | Sandwich ELISA                          | 2.5 mg/kg                             | 30         | Neogen                |
|  | REVEAL 3-D for Soy  | Soy                                    | Lateral Flow Strip (with overflow line) | 5 mg/kg; 2 µg/100cm <sup>2</sup> swab | 5          | Neogen                |
|  | ALERT for Soy       | Soy                                    | Sandwich ELISA                          | 2.5 mg/kg                             | 30         | Neogen                |
|  | Soy ESSOYPRD-48     | Soy Flour Protein                      | Sandwich ELISA                          | 2.5-25 mg/kg                          | 80         | ELISA Systems         |
|  | Soy ELISA Kit       | Soy in raw & processed foods           | Sandwich ELISA                          | 0.31 mg/kg                            | <120       | Crystal Chem          |
|  | AgraQuant® Soy      | Soy                                    | Sandwich ELISA                          | 0.016 mg/kg                           | 60         | Romer Labs            |
|  | Monotrace Soy ELISA | Soy                                    | Sandwich ELISA                          | LOD: 0.23 mg/kg LOQ: 1 mg/kg          | 40         | BioFront Technologies |
|  | Soja (Soy) ELISA    | Soja trypsin inhibitor                 | Sandwich ELISA                          | 0.016 mg/kg                           | 60         | Immunolab             |
|  | AlerTox Soy (STI)   | Soja trypsin inhibitor                 | Sandwich ELISA                          | LOD: 0.016 mg/kg LOQ: 0.05 mg/kg      | Not stated | Biomedal Diagnostics  |

|      |                        |                          |                    |                                                                                             |     |                      |
|------|------------------------|--------------------------|--------------------|---------------------------------------------------------------------------------------------|-----|----------------------|
|      | AlerTox Soy            | Soy                      | Lateral Flow Strip | 1 mg/kg                                                                                     | 10  | Biomedal Diagnostics |
|      | PROTEON for Soy        | Soy                      | Sandwich ELISA     | LOD: 1.1 mg/kg LOQ: 3.5 mg/kg                                                               | 90  | Zeulab               |
|      | Soya Check             | Soy                      | Sandwich ELISA     | LOD: <0.7 mg/kg LOQ: 2 mg/kg                                                                | 100 | BioCheck (UK) Ltd    |
| Milk | RIDASCREEN Fast Milk   | Casein & B-lactoglobulin | Sandwich ELISA     | 0.7 mg/kg                                                                                   | 30  | R-Biopharm AG        |
|      | RIDASCREEN Fast Casein | Casein/caseinates        | Sandwich ELISA     | 0.12 mg/kg casein in ice-cream/chocolate/beverages; 0.71 mg/kg casein for all other samples | 30  | R-Biopharm AG        |
|      | VERATOX for Casein     | Casein                   | Sandwich ELISA     | 2.5 mg/kg                                                                                   | 30  | Neogen               |
|      | Casein ESCASPRD-48     | Casein                   | Sandwich ELISA     | 1.0-10 mg/kg                                                                                | 45  | ELISA Systems        |
|      | AgraQuant® Casein      | Casein                   | Sandwich ELISA     | 0.04 mg/kg                                                                                  | 60  | Romer Labs           |
|      | Monotrace Milk         | Casein                   | Sandwich           | LOD: 0.12 mg/kg LOQ: 1 mg/kg                                                                | 40  | BioFront             |

|  |                                  |        |                                               |                                                |               |                                              |
|--|----------------------------------|--------|-----------------------------------------------|------------------------------------------------|---------------|----------------------------------------------|
|  | ELISA                            |        | ELISA                                         |                                                |               | Technologies                                 |
|  | Casein ELISA Kit                 | Casein | Sandwich<br>ELISA                             | 0.31 mg/kg                                     | Not<br>stated | Crystal Chem                                 |
|  | Casein Lateral<br>Flow Kit       | Casein | Lateral Flow<br>Strip                         | 5 mg/kg                                        | 15            | Crystal Chem                                 |
|  | BioKits RAPID<br>3D™ Casein Test | Casein | Lateral Flow<br>Strip (with<br>overflow line) | Screening test (no LOD)                        | 5             | Tepnel<br>Reserach<br>Products &<br>Services |
|  | AgraStrip®<br>Casein             | Casein | Lateral Flow<br>Strip                         | 2 mg/kg casein; 5 mg/kg skimmed milk<br>powder | 11            | Romer Labs                                   |
|  | Casein ELISA                     | Casein | Sandwich<br>ELISA                             | 0.04 mg/kg                                     | 60            | Immunolab                                    |
|  | AlerTox Casein<br>ELISA          | Casein | Sandwich<br>ELISA                             | LOD: 0.05 mg/kg LOQ: 0.20 mg/kg                | Not<br>stated | Biomedal<br>Diagnostics                      |
|  | AlerTox Sticks<br>Casein         | Casein | Lateral Flow<br>Strip                         | 2.5 mg/kg                                      | 10            | Biomedal<br>Diagnostics                      |
|  | Casein ELISA Kit                 | Casein | Sandwich<br>ELISA                             | 0.31 mg/kg                                     | Not<br>stated | Crystal Chem                                 |

|  |                                        |                                           |                      |                                |               |                      |
|--|----------------------------------------|-------------------------------------------|----------------------|--------------------------------|---------------|----------------------|
|  | Milk-Check<br>(Casein)                 | Casein                                    | Sandwich<br>ELISA    | LOD: 0.2 mg/kg; LOQ: 0.8 mg/kg | 100           | BioCheck (UK)<br>Ltd |
|  | RIDASCREEN<br>Fast B-<br>lactoglobulin | B-lactoglobulin                           | Sandwich<br>ELISA    | 0.19 mg/kg                     | 30            | R-Biopharm AG        |
|  | RIDASCREEN B-<br>lactoglobulin         | B-lactoglobulin in hydrolysed<br>products | Competitive<br>ELISA | 0.1 mg/kg                      | 165           | R-Biopharm AG        |
|  | Beta<br>Lactoglobulin<br>ESMRDBLG-48   | B-lactoglobulin                           | Sandwich<br>ELISA    | 0.1-1.0 mg/kg                  | 45            | ELISA Systems        |
|  | Beta-<br>Lactoglobulin<br>ELISA Kit    | B-lactoglobulin                           | Sandwich<br>ELISA    | 0.31 mg/kg                     | Not<br>Stated | Crystal Chem         |
|  | BioKits BLG<br>Assay Kit               | B-lactoglobulin                           | Sandwich<br>ELISA    | 2 mg/kg                        | 120           | Neogen               |
|  | AgraQuant® B-<br>lactoglobulin         | B-lactoglobulin                           | Sandwich<br>ELISA    | 0.0015 mg/kg                   | 60            | Romer Labs           |
|  | Beta-<br>Lactoglobulin                 | B-lactoglobulin                           | Sandwich<br>ELISA    | 0.0015 mg/kg                   | 60            | Immunolab            |

|  |                                |                 |                        |                                    |               |                         |
|--|--------------------------------|-----------------|------------------------|------------------------------------|---------------|-------------------------|
|  | ELISA                          |                 |                        |                                    |               |                         |
|  | AlerTox BLG<br>ELISA           | B-lactoglobulin | Sandwich<br>ELISA      | LOD: 0.0015 mg/kg LOQ: 0.010 mg/kg | Not<br>stated | Biomedal<br>Diagnostics |
|  | AlerTox Sticks<br>BLG          | B-lactoglobulin | Lateral Flow<br>Strips | 2.5 mg/kg                          | 10            | Biomedal<br>Diagnostics |
|  | Milk-Check (BLG)               | B-lactoglobulin | Sandwich<br>ELISA      | LOD: <0.1 mg/kg LOQ: 0.2 mg/kg     | 100           | BioCheck (UK)<br>Ltd    |
|  | PROTEON Milk<br>ELISA          | B-lactoglobulin | Sandwich<br>ELISA      | LOD: 0.03 mg/kg LOQ: 0.05 mg/kg    | 90            | Zeulab                  |
|  | PROTEON<br>EXPRESS for<br>Milk | Milk            | Lateral Flow<br>Strip  | 1-2 mg/kg                          | 10            | Zeulab                  |
|  | Bioavid Lateral<br>Flow Milk   | Milk            | Lateral Flow<br>Strip  | 1 mg/kg                            | 8             | R-Biopharm AG           |
|  | Milk Check                     | Milk            | Sandwich<br>ELISA      | LOD: <0.1 mg/kg LOQ: 1 mg/kg       | 100           | BioCheck (UK)<br>Ltd    |
|  | VERATOX for<br>Total Milk      | Casein & Whey   | Sandwich<br>ELISA      | 2.5 mg/kg                          | 30            | Neogen                  |
|  | REVEAL for Total               | Casein & Whey   | Lateral Flow           | 5 mg/kg                            | 5             | Neogen                  |

|     |                                   |                  |                                               |                                                                           |               |                         |
|-----|-----------------------------------|------------------|-----------------------------------------------|---------------------------------------------------------------------------|---------------|-------------------------|
|     | Milk                              |                  | Strip                                         |                                                                           |               |                         |
|     | REVEAL 3-D for<br>Total Milk      | Casein & Whey    | Lateral Flow<br>Strip (with<br>overflow line) | 5 mg/kg                                                                   | 5             | Neogen                  |
|     | ALERT for Total<br>Milk Allergen  | Total Milk       | Sandwich<br>ELISA                             | 5 mg/kg                                                                   | 30            | Neogen                  |
|     | Milk ELISA                        | Milk             | Sandwich<br>ELISA                             | 0.005 mg/kg                                                               | 60            | Immunolab               |
|     | AlerTox Milk<br>ELISA             | Milk             | Sandwich<br>ELISA                             | LOD: 0.05 mg/kg LOQ: 0.5 mg/kg                                            | Not<br>stated | Biomedal<br>Diagnostics |
|     | Total Milk<br>ESTMLK-48           | Casein & Whey    | Sandwich<br>ELISA                             | 0.25-2.5 mg/kg                                                            | 45            | ELISA Systems           |
| Egg | RIDASCREEN<br>FAST Egg<br>Protein | Whole Egg Powder | Sandwich<br>ELISA                             | 0.1 mg/kg whole egg powder; 0.03 mg/kg<br>egg white protein               | 30            | R-Biopharm AG           |
|     | RIDASCREEN<br>FAST Lysozym        | Lysozyme         | Sandwich<br>ELISA                             | 0.006 mg/kg lysozyme in wine; 0.016<br>mg/kg lysozyme in cheese + sausage | 30            | R-Biopharm AG           |
|     | Lysozyme ELISA                    | Lysozyme         | Sandwich<br>ELISA                             | 0.002 mg/kg                                                               | 60            | Immunolab               |



|  |                               |                     |                                               |                                             |               |                         |
|--|-------------------------------|---------------------|-----------------------------------------------|---------------------------------------------|---------------|-------------------------|
|  | AlexTox<br>Lysozyme ELISA     | Lysozyme            | Sandwich<br>ELISA                             | LOD: 0.002 mg/kg LOQ: 0.025 mg/kg           | Not<br>stated | Biomedal<br>Diagnostics |
|  | VERATOX for<br>Egg            | Egg                 | Sandwich<br>ELISA                             | 2.5 mg/kg                                   | 30            | Neogen                  |
|  | REVEAL 3-D for<br>Egg         | Egg                 | Lateral Flow<br>Strip (with<br>overflow line) | 5 mg/kg; 10 µg/100 cm <sup>2</sup> egg swab | 5             | Neogen                  |
|  | AlerTox Egg<br>ELISA          | Egg                 | Sandwich<br>ELISA                             | LOD: 0.05 mg/kg LOQ: 0.4 mg/kg              | Not<br>stated | Biomedal<br>Diagnostics |
|  | AlerTox Sticks<br>Egg         | Egg                 | Lateral Flow<br>Strip                         | 1 mg/kg                                     | 10            | Biomedal<br>Diagnostics |
|  | PROTEON Egg<br>ELISA          | Egg                 | Sandwich<br>ELISA                             | LOD: 0.05 mg/kg LOQ: 0.18 mg/kg             | 90            | Zeulab                  |
|  | PROTEON<br>EXPRESS for<br>Egg | Egg                 | Lateral Flow<br>Strip                         | 1 mg/kg                                     | 10            | Zeulab                  |
|  | Egg Check                     | Egg                 | Sandwich<br>ELISA                             | LOD: <0.2 mg/kg; LOQ: 0.4mg/kg              | 100           | BioCheck (UK)<br>Ltd    |
|  | BioKits RAPID                 | Ovomucoid (Gal d 1) | Lateral Flow                                  | 7.6 mg/kg egg white protein; 0.5 mg/kg      | 5             | Tepnel                  |

|  |                                  |           |                            |                                                                  |            |                              |
|--|----------------------------------|-----------|----------------------------|------------------------------------------------------------------|------------|------------------------------|
|  | 3D™ Egg Test                     |           | Strip (with overflow line) | whole egg powder; 5 µg/25cm2 whole egg powder environmental swab |            | Reserach Products & Services |
|  | Enhanced Egg Residue Kit         | Ovomucoid | Sandwich ELISA             | 1.0-10 mg/kg                                                     | Not Stated | ELISA Systems                |
|  | Monotrace Egg ELISA              | Ovomucoid | Sandwich ELISA             | LOD: 0.3 mg/kg LOQ: 1 mg/kg                                      | 40         | BioFront Technologies        |
|  | Egg (Ovalbumin) ELISA Kit        | Ovalbumin | Sandwich ELISA             | 0.31 mg/kg                                                       | Not Stated | Crystal Chem                 |
|  | Egg (Ovalbumin) Lateral Flow Kit | Ovalbumin | Lateral Flow Strip         | 5 mg/kg                                                          | 15         | Crystal Chem                 |
|  | BioKits Egg Assay Kit            | Ovalbumin | Sandwich ELISA             | 0.1 mg/kg                                                        | 75         | Neogen                       |
|  | Ovalbumin ELISA                  | Ovalbumin | Sandwich ELISA             | 0.004 mg/kg                                                      | 60         | Immunolab                    |
|  | AlerTox Ovalbumin ELISA          | Ovalbumin | Sandwich ELISA             | LOD: 0.004 mg/kg LOQ: 0.025 mg/kg                                | Not stated | Biomedal Diagnostics         |
|  | Egg White ELISA                  | Egg White | Sandwich ELISA             | 0.05 mg/kg                                                       | 60         | Immunolab                    |

|      |                                     |                       |                                               |                                                           |    |               |
|------|-------------------------------------|-----------------------|-----------------------------------------------|-----------------------------------------------------------|----|---------------|
|      | AgraQuant® Egg White                | Egg White             | Sandwich<br>ELISA                             | 0.05 mg/kg                                                | 60 | Romer Labs    |
|      | AgraStrip® Egg                      | Egg (Dried Whole Egg) | Lateral Flow<br>Strip                         | 2 mg/kg                                                   | 11 | Romer Labs    |
| Nuts | RIDASCREEN<br>FAST<br>Mandel/Almond | Almond                | Sandwich<br>ELISA                             | 1.2 mg/kg                                                 | 30 | R-Biopharm AG |
|      | Bioavid Lateral<br>Flow Almond      | Almond                | Lateral Flow<br>Strip                         | 1 mg/kg                                                   | 10 | R-Biopharm AG |
|      | VERATOX for<br>Almond               | Almond                | Sandwich<br>ELISA                             | LOD: 0.3 mg/kg LOQ:2.5 mg/kg                              | 30 | Neogen        |
|      | REVEAL 3-D for<br>Almond            | Almond                | Lateral Flow<br>Strip (with<br>overflow line) | 5 mg/kg almond; 1 µg/100cm <sup>3</sup> almond<br>protein | 5  | Neogen        |
|      | Almonds ESARD-<br>48                | Almond                | Sandwich<br>ELISA                             | 0.5-5 mg/kg                                               | 50 | ELISA Systems |
|      | AgraQuant®<br>Almond                | Almond                | Sandwich<br>ELISA                             | 0.2 mg/kg                                                 | 60 | Romer Labs    |
|      | AgraStrip®                          | Almond                | Lateral Flow                                  | 2 mg/kg                                                   | 11 | Romer Labs    |

|  |                                    |            |                       |                                 |               |                          |
|--|------------------------------------|------------|-----------------------|---------------------------------|---------------|--------------------------|
|  | Almond                             |            | Strip                 |                                 |               |                          |
|  | Almond ELISA                       | Almond     | Sandwich<br>ELISA     | 0.2 mg/kg                       | 60            | Immunolab                |
|  | Monotrace<br>Almond ELISA          | Almond     | Sandwich<br>ELISA     | LOD: 0.15 mg/kg LOQ: 1 mg/kg    | 40            | BioFront<br>Technologies |
|  | AlerTox Almond<br>ELISA            | Almond     | Sandwich<br>ELISA     | LOD: 0.2 mg/kg LOD: 0.5 mg/kg   | Not<br>stated | Biomedal<br>Diagnostics  |
|  | AlerTox Sticks<br>Almond           | Almond     | Lateral Flow<br>Strip | 10 mg/kg                        | 10            | Biomedal<br>Diagnostics  |
|  | Almond Check                       | Almond     | Sandwich<br>ELISA     | LOD: <0.25 mg/kg LOQ: 0.5 mg/kg | 100           | BioCheck (UK)<br>Ltd     |
|  | Bioavid Lateral<br>Flow Brazil Nut | Brazil Nut | Lateral Flow<br>Strip | 1 mg/kg                         | 10            | R-Biopharm AG            |
|  | AgraStrip® Brazil<br>Nut           | Brazil Nut | Lateral Flow<br>Strip | 5 mg/kg                         | 11            | Romer Labs               |
|  | Brazil nut ELISA                   | Brazil Nut | Sandwich<br>ELISA     | 0.2 mg/kg                       | 60            | Immunolab                |
|  | Monotrace Brazil<br>Nut ELISA      | Brazil Nut | Sandwich<br>ELISA     | LOD: 0.14 mg/kg LOQ: 1 mg/kg    | 40            | BioFront<br>Technologies |

|  |                                          |                                                |                       |                               |               |                          |
|--|------------------------------------------|------------------------------------------------|-----------------------|-------------------------------|---------------|--------------------------|
|  | RIDASCREEN<br>FAST Cashew                | Cashew                                         | Sandwich<br>ELISA     | 0.09 mg/kg                    | 30            | R-Biopharm AG            |
|  | Bioavid Lateral<br>Flow Cashew<br>Kernel | Cashew Kernel                                  | Lateral Flow<br>Strip | 1 mg/kg                       | 10            | R-Biopharm AG            |
|  | Cashew ELISA                             | Cashew (4% cross reactivity<br>with pistachio) | Sandwich<br>ELISA     | 0.2 mg/kg                     | 60            | Immunolab                |
|  | Monotrace<br>Cashew ELISA                | Cashew                                         | Sandwich<br>ELISA     | LOD: 0.12 mg/kg LOQ: 1 mg/kg  | 40            | BioFront<br>Technologies |
|  | AlerTox Cashew<br>ELISA                  | Cashew                                         | Sandwich<br>ELISA     | LOD: 0.2 mg/kg LOD: 2 mg/kg   | Not<br>stated | Biomedal<br>Diagnostics  |
|  | Cashew Check                             | Cashew                                         | Sandwich<br>ELISA     | LOD: <0.2 mg/kg; LOQ: 2 mg/kg | 100           | BioCheck (UK)<br>Ltd     |
|  | Bioavid Lateral<br>Flow Coconut          | Coconut                                        | Lateral Flow<br>Strip | 1 mg/kg                       | 10            | R-Biopharm AG            |
|  | Coconut ELISA                            | Coconut                                        | Sandwich<br>ELISA     | 0.4 mg/kg                     | 60            | Immunolab                |
|  | Monotrace<br>Coconut ELISA               | Coconut                                        | Sandwich<br>ELISA     | 0.13 mg/kg                    | 40            | BioFront<br>Technologies |

|  |                                  |          |                                               |                                           |               |                         |
|--|----------------------------------|----------|-----------------------------------------------|-------------------------------------------|---------------|-------------------------|
|  | AletTox Coconut                  | Coconut  | Sandwich<br>ELISA                             | LOD: 0.4 mg/kg LOQ: 2 mg/kg               | Not<br>stated | Biomedal<br>Diagnostics |
|  | RIDASCREEN<br>FAST Hazelnut      | Hazelnut | Sandwich<br>ELISA                             | 1.5 mg/kg                                 | 30            | R-Biopharm AG           |
|  | Bioavid Lateral<br>Flow Hazelnut | Hazelnut | Lateral Flow<br>Strip                         | 1 mg/kg                                   | 10            | R-Biopharm AG           |
|  | VERATOX for<br>Hazelnut          | Hazelnut | Sandwich<br>ELISA                             | 2.5 mg/kg                                 | 30            | Neogen                  |
|  | REVEAL 3-D for<br>Hazelnut       | Hazelnut | Lateral Flow<br>Strip (with<br>overflow line) | 5-10 mg/kg; 10 µg/100cm <sup>2</sup> swab | 5             | Neogen                  |
|  | Hazelnut<br>ESHRD-48             | Hazelnut | Sandwich<br>ELISA                             | 0.5-5 mg/kg                               | 35            | ELISA Systems           |
|  | AgraQuant®<br>Hazelnut           | Hazelnut | Sandwich<br>ELISA                             | 0.3 mg/kg                                 | 60            | Romer Labs              |
|  | AgraStrip®<br>Hazelnut           | Hazelnut | Lateral Flow<br>Strip                         | 5 mg/kg                                   | 11            | Romer Labs              |
|  | Hazelnut ELISA                   | Hazelnut | Sandwich<br>ELISA                             | 0.3 mg/kg                                 | 60            | Immunolab               |

|  |                                          |           |                       |                             |               |                          |
|--|------------------------------------------|-----------|-----------------------|-----------------------------|---------------|--------------------------|
|  | Monotrace<br>Hazelnut ELISA              | Hazelnut  | Sandwich<br>ELISA     | 0.04 mg/kg                  | 40            | BioFront<br>Technologies |
|  | AlerTox<br>Hazelnut ELISA                | Hazelnut  | Sandwich<br>ELISA     | LOD:0.3 mg/kg; LOQ: 1 mg/kg | Not<br>stated | Biomedal<br>Diagnostics  |
|  | AleTox Sticks<br>Hazelnut                | Hazelnut  | Lateral Flow<br>Strip | 1 mg/kg                     | 10            | Biomedal<br>Diagnostics  |
|  | Hazelnut Check                           | Hazelnut  | Sandwich<br>ELISA     | LOD:<0.5 mg/kg LOQ: 1 mg/kg | 100           | BioCheck (UK)<br>Ltd     |
|  | RIDASCREEN<br>FAST<br>Macademia          | Macademia | Sandwich<br>ELISA     | 0.38 mg/kg                  | 30            | R-Biopharm AG            |
|  | Bioavid Lateral<br>Flow Macademia<br>Nut | Macademia | Lateral Flow<br>Strip | 1 mg/kg                     | 10            | R-Biopharm AG            |
|  | AgraStrip®<br>Macademia Nut              | Macademia | Lateral Flow<br>Strip | 2 mg/kg                     | 11            | Romer Labs               |
|  | Macademia Nut<br>ELISA                   | Macademia | Sandwich<br>ELISA     | 0.1 mg/kg                   | 60            | Immunolab                |
|  | Monotrace                                | Macademia | Sandwich              | 0.13 mg/kg                  | 40            | BioFront                 |

|  |                                |                          |                                               |                                       |               |                         |
|--|--------------------------------|--------------------------|-----------------------------------------------|---------------------------------------|---------------|-------------------------|
|  | Macademia Nut<br>ELISA         |                          | ELISA                                         |                                       |               | Technologies            |
|  | AlerTox<br>Macademia<br>ELISA  | Macademia                | Sandwich<br>ELISA                             | LOD: 0.1 mg/kg LOQ: 1 mg/kg           | Not<br>stated | Biomedal<br>Diagnostics |
|  | RIDASCREEN<br>FAST Peanut      | Peanut                   | Sandwich<br>ELISA                             | 1.3 mg/kg                             | 30            | R-Biopharm AG           |
|  | Bioavid Lateral<br>Flow Peanut | Peanut                   | Lateral Flow<br>Strip                         | ≤1 mg/kg                              | 10            | R-Biopharm AG           |
|  | VERATOX for<br>Peanut          | Peanut                   | Sandwich<br>ELISA                             | 2.5 mg/kg                             | 30            | Neogen                  |
|  | REVEAL for<br>Peanut           | Peanut                   | Lateral Flow<br>Strip                         | 5 mg/kg                               | 10            | Neogen                  |
|  | REVEAL 3-D for<br>Peanut       | Peanut                   | Lateral Flow<br>Strip (with<br>overflow line) | 5 mg/kg; 1 µg/100cm <sup>2</sup> swab | 5             | Neogen                  |
|  | Peanut ESPRDT-<br>48           | Peanut (Ara h1 & Ara h2) | Sandwich<br>ELISA                             | 1-15 mg/kg                            | 35            | ELISA Systems           |
|  | Peanut Lateral                 | Peanut                   | Lateral Flow                                  | 5 mg/kg                               | 15            | Crystal Chem            |



|  |                             |        |                       |                              |               |                          |
|--|-----------------------------|--------|-----------------------|------------------------------|---------------|--------------------------|
|  | Flow Kit                    |        | Strip                 |                              |               |                          |
|  | Peanut ELISA Kit            | Peanut | Sandwich<br>ELISA     | 0.31 mg/kg                   | Not<br>Stated | Crystal Chem             |
|  | BioKits Peanut<br>Assay Kit | Peanut | Sandwich<br>ELISA     | 0.1 mg/kg                    | 75            | Neogen                   |
|  | ALERT for<br>Peanut         | Peanut | Sandwich<br>ELISA     | 5 mg/kg                      | 30            | Neogen                   |
|  | AgraQuant®<br>Peanut        | Peanut | Sandwich<br>ELISA     | 0.1 mg/kg                    | 60            | Romer Labs               |
|  | AgraStrip®<br>Peanut        | Peanut | Lateral Flow<br>Strip | 1 mg/kg                      | 11            | Romer Labs               |
|  | Peanut ELISA                | Peanut | Sandwich<br>ELISA     | 0.1 mg/kg                    | 60            | Immunolab                |
|  | Monotrace<br>Peanut ELISA   | Peanut | Sandwich<br>ELISA     | LOD: 0.24 mg/kg LOQ: 1 mg/kg | 40            | BioFront<br>Technologies |
|  | AlerTox Peanut<br>ELISA     | Peanut | Sandwich<br>ELISA     | LOD: 0.3 mg/kg LOQ: 1 mg/kg  | Not<br>stated | Biomedal<br>Diagnostics  |
|  | AleTox Sticks<br>Peanut     | Peanut | Lateral Flow<br>Strip | 1 mg/kg                      | 10            | Biomedal<br>Diagnostics  |

|  |                                   |                  |                       |                               |               |                          |
|--|-----------------------------------|------------------|-----------------------|-------------------------------|---------------|--------------------------|
|  | Peanut Check                      | Peanut           | Sandwich<br>ELISA     | LOD: <0.5 mg/kg LOQ: 1 mg/kg  | 100           | BioCheck (UK)<br>Ltd     |
|  | Pistachio Check                   | Pistachio        | Sandwich<br>ELISA     | LOD: <0.2 mg/kg LOQ: 1 mg/kg  | 100           | BioCheck (UK)<br>Ltd     |
|  | Pistachio ELISA                   | Pistachio        | Sandwich<br>ELISA     | 0.13 mg/kg                    | 60            | Immunolab                |
|  | Bioavid Lateral<br>Flow Pistachio | Pistachio        | Lateral Flow<br>Strip | 1 mg/kg                       | 10            | R-Biopharm AG            |
|  | Monotrace<br>Pistachio ELISA      | Pistachio        | Sandwich<br>ELISA     | LOD: 0.12 mg/kg LOQ: 1 mg/kg  | 40            | BioFront<br>Technologies |
|  | AlerTox Pistachio<br>ELISA        | Pistachio        | Sandwich<br>ELISA     | LOD: 0.13 mg/kg LOQ: 1 mg/kg  | Not<br>stated | Biomedal<br>Diagnostics  |
|  | AgraStrip®<br>Cashew/Pistachio    | Cashew/Pistachio | Lateral Flow<br>Strip | 5 mg/kg                       | 11            | Romer Labs               |
|  | Monotrace Pine<br>Nut ELISA       | Pine Nut         | Sandwich<br>ELISA     | LOD: 0.24 mg/kg LOQ: 1 mg/kg  | 40            | BioFront<br>Technologies |
|  | Monotrace Pecan<br>ELISA          | Pecan            | Sandwich<br>ELISA     | LOD: 0.17 mg/kg; LOQ: 1 mg/kg | 40            | BioFront<br>Technologies |
|  | Pecan nut ELISA                   | Pecan            | Sandwich              | 0.2 mg/kg                     | 60            | Immunolab                |

|  |                                |                                                        |                       |                                                                   |               |                          |
|--|--------------------------------|--------------------------------------------------------|-----------------------|-------------------------------------------------------------------|---------------|--------------------------|
|  |                                |                                                        | ELISA                 |                                                                   |               |                          |
|  | Bioavid Lateral<br>Flow Walnut | Walnut & Pecan                                         | Lateral Flow<br>Strip | 10 mg/kg                                                          | 10            | R-Biopharm AG            |
|  | BioKits Walnut<br>Assay        | Walnut                                                 | Sandwich<br>ELISA     | 0.25 mg/kg                                                        | 75            | Neogen                   |
|  | AgraQuant®<br>Walnut           | Walnut                                                 | Sandwich<br>ELISA     | 0.35 mg/kg                                                        | 60            | Romer Labs               |
|  | AgraStrip®<br>Walnut           | Walnut                                                 | Lateral Flow<br>Strip | 10 mg/kg                                                          | 11            | Romer Labs               |
|  | Walnut ELISA                   | Walnut                                                 | Sandwich<br>ELISA     | 0.35 mg/kg                                                        | 60            | Immunolab                |
|  | Monotrace<br>Walnut ELISA      | Walnut                                                 | Sandwich<br>ELISA     | LOD:0.22 mg/kg LOQ: 1 mg/kg                                       | Not<br>stated | BioFront<br>Technologies |
|  | AlerTox Walnut<br>ELISA        | Walnut                                                 | Sandwich<br>ELISA     | LOD: 0.6 mg/kg LOQ: 2 mg/kg                                       | Not<br>stated | Biomedal<br>Diagnostics  |
|  | Walnut Check                   | Walnut                                                 | Sandwich<br>ELISA     | LOD: <1.0 mg/kg LOQ: 2 mg/kg                                      | 100           | BioCheck (UK)<br>Ltd     |
|  | REVEAL for<br>Multi-Treenut    | Almond, cashew, hazelnut,<br>walnut, pecan & pistachio | Lateral Flow<br>Strip | Rinse samples: 5-10 mg/kg; CIP swabs:<br>20 µg/100cm <sup>2</sup> | 10            | Neogen                   |

|            |                                |        |                                               |             |     |                          |
|------------|--------------------------------|--------|-----------------------------------------------|-------------|-----|--------------------------|
| Oil Plants | RIDASCREEN<br>FAST Sesame      | Sesame | Sandwich<br>ELISA                             | 0.2 mg/kg   | 30  | R-Biopharm AG            |
|            | Bioavid Lateral<br>Flow Sesame | Sesame | Lateral Flow<br>Strip                         | 1 mg/kg     | 10  | R-Biopharm AG            |
|            | REVEAL 3-D for<br>Sesame       | Sesame | Lateral Flow<br>Strip (with<br>overflow line) | 5 mg/kg     | 5   | Neogen                   |
|            | Sesame<br>ESSESRD-48           | Sesame | Sandwich<br>ELISA                             | 0.5-5 mg/kg | 65  | ELISA Systems            |
|            | BioKits Sesame<br>Assay Kit    | Sesame | Sandwich<br>ELISA                             | 1 mg/kg     | 180 | Neogen                   |
|            | AgraQuant®<br>Sesame           | Sesame | Sandwich<br>ELISA                             | 0.2 mg/kg   | 60  | Romer Labs               |
|            | AgraStrip®<br>Sesame           | Sesame | Lateral Flow<br>Strip                         | 5 mg/kg     | 11  | Romer Labs               |
|            | Sesame ELISA                   | Sesame | Sandwich<br>ELISA                             | 0.2 mg/kg   | 60  | Immunolab                |
|            | Monotrace<br>Sesame ELISA      | Sesame | Sandwich<br>ELISA                             | 0.3 mg/kg   | 40  | BioFront<br>Technologies |

|         |                                    |             |                                               |                                                                            |               |                         |
|---------|------------------------------------|-------------|-----------------------------------------------|----------------------------------------------------------------------------|---------------|-------------------------|
|         | AleTox Sesame<br>ELISA             | Sesame      | Sandwich<br>ELISA                             | LOD: 0.2 mg/kg<br>LOD: 2 mg/kg                                             | Not<br>stated | Biomedal<br>Diagnostics |
|         | Sesame Check                       | Sesame      | Sandwich<br>ELISA                             | LOD: <0.2 mg/kg<br>LOQ: 2 mg/kg                                            | 100           | BioCheck (UK)<br>Ltd    |
| Seafood | RIDASCREEN<br>FAST Crustacean      | Tropomyosin | Sandwich<br>ELISA                             | 2 mg/kg                                                                    | 30            | R-Biopharm AG           |
|         | Bioavid Lateral<br>Flow Crustacean | Tropomyosin | Lateral Flow<br>Strip                         | 10 mg/kg                                                                   | 10            | R-Biopharm AG           |
|         | VERATOX for<br>Crustacea           | Tropomyosin | Sandwich<br>ELISA                             | 2.5 mg/kg                                                                  | 30            | Neogen                  |
|         | REVEAL 3-D for<br>Crustacea        | Tropomyosin | Lateral Flow<br>Strip (with<br>overflow line) | 5-10 mg/kg; 40 µg/100cm <sup>2</sup> cooked prawn<br>extract               | 5             | Neogen                  |
|         | Crustacean<br>ESCRURD-48           | Tropomyosin | Sandwich<br>ELISA                             | 0.05-0.50 mg/kg                                                            | 60            | ELISA Systems           |
|         | AgraQuant®<br>Crustacea            | Tropomyosin | Sandwich<br>ELISA                             | 0.09 mg/kg                                                                 | 60            | Romer Labs              |
|         | Crustacean<br>ELISA                | Tropomyosin | Sandwich<br>ELISA                             | Soy sauce: 0.0017 mg/kg; vegetable<br>soup: 0.0036 mg/kg; bakery products: | 60            | Immunolab               |

|  |                                |             |                        |                                                         |               |                          |
|--|--------------------------------|-------------|------------------------|---------------------------------------------------------|---------------|--------------------------|
|  |                                |             |                        | 0.0009 mg/kg; fish: 0.0085 mg/kg; meat:<br>0.0103 mg/kg |               |                          |
|  | Monotrace<br>Crustacea ELISA   | Tropomyosin | Sandwich<br>ELISA      | LOD: 0.07 mg/kg LOQ: 1mg/kg                             | 40            | BioFront<br>Technologies |
|  | AlerTox<br>Crustacean<br>ELISA | Tropomyosin | Sandwich<br>ELISA      | LOD: 0.001 mg/kg LOQ: 0.020 mg/kg                       | Not<br>stated | Biomedal<br>Diagnostics  |
|  | AlerTox Sticks<br>Crustacea    | Tropomyosin | Lateral Flow<br>Strips | 7 mg/kg (dry) 33 mg/kg (wet)                            | 10            | Biomedal<br>Diagnostics  |
|  | Crustacea-Check                | Tropomyosin | Sandwich<br>ELISA      | LOD: 0.1 mg/kg LOQ: 1.2 mg/kg                           | 100           | BioCheck (UK)<br>Ltd     |
|  | Fish Check                     | Fish        | Sandwich<br>ELISA      | LOD: <1.0 mg/kg LOQ: 5 mg/kg                            | 100           | BioCheck (UK)<br>Ltd     |
|  | AlerTox Sticks<br>Fish         | Fish        | Lateral Flow<br>Strips | 0.35 mg/kg (dry) 1 mg/kg (wet)                          | 10            | Biomedal<br>Diagnostics  |
|  | AlerTox Fish<br>ELISA          | Fish        | Sandwich<br>ELISA      | LOD: 1.4 mg/kg LOQ 4 mg/kg                              | Not<br>stated | Biomedal<br>Diagnostics  |
|  | Fish ELISA                     | Fish        | Sandwich<br>ELISA      | 1.4 mg/kg                                               | 60            | Immunolab                |

|               |                            |                                           |                   |                                                                                                               |               |                          |
|---------------|----------------------------|-------------------------------------------|-------------------|---------------------------------------------------------------------------------------------------------------|---------------|--------------------------|
| Miscellaneous | RIDASCREEN<br>FAST Lupine  | Lupin                                     | Sandwich<br>ELISA | 0.7 mg/kg                                                                                                     | 30            | R-Biopharm AG            |
|               | VERATOX for<br>Lupine      | Lupin                                     | Sandwich<br>ELISA | 2.5 mg/kg                                                                                                     | 30            | Neogen                   |
|               | Lupin ESLFP-48             | Lupin Flour Protein                       | Sandwich<br>ELISA | 0.5-5 mg/kg                                                                                                   | Not<br>Stated | ELISA Systems            |
|               | AgraQuant®<br>Lupin        | Lupin                                     | Sandwich<br>ELISA | 0.2 mg/kg                                                                                                     | 60            | Romer Labs               |
|               | Lupine ELISA               | Lupin                                     | Sandwich<br>ELISA | Sausage: 0.2 mg/kg; bread: 0.3 mg/kg;<br>orange juice: 0.7 mg/kg; ketchup: 0.1<br>mg/kg; croquette: 0.2 mg/kg | 60            | Immunolab                |
|               | Monotrace Lupin<br>ELISA   | Lupin                                     | Sandwich<br>ELISA | LOD: 0.16 mg/kg LOQ: 1 mg/kg                                                                                  | 40            | BioFront<br>Technologies |
|               | AlerTox Lupine<br>ELISA    | Lupin                                     | Sandwich<br>ELISA | LOD: 0.2 mg/kg LOD: 2 mg/kg                                                                                   | Not<br>stated | Biomedal<br>Diagnostics  |
|               | Lupin Check                | Lupin                                     | Sandwich<br>ELISA | LOD: <0.3 mg/kg LOQ: 2 mg/kg                                                                                  | 100           | BioCheck (UK)<br>Ltd     |
|               | RIDASCREEN<br>FAST Mustard | Mustard (white, yellow,<br>brown & black) | Sandwich<br>ELISA | 0.22 mg/kg                                                                                                    | 30            | R-Biopharm AG            |

|  |                                 |         |                                               |                                       |               |                          |
|--|---------------------------------|---------|-----------------------------------------------|---------------------------------------|---------------|--------------------------|
|  | Bioavid Lateral<br>Flow Mustard | Mustard | Lateral Flow<br>Strip                         | 1 mg/kg                               | 10            | R-Biopharm AG            |
|  | VERATOX for<br>Mustard          | Mustard | Sandwich<br>ELISA                             | 2.5-25 mg/kg                          | 30            | Neogen                   |
|  | REVEAL 3-D for<br>Mustard       | Mustard | Lateral Flow<br>Strip (with<br>overflow line) | 5 mg/kg; 2 µg/100cm <sup>2</sup> swab | 5             | Neogen                   |
|  | Mustard ESMUS-<br>48            | Mustard | Sandwich<br>ELISA                             | 1-10 mg/kg                            | Not<br>Stated | ELISA Systems            |
|  | AgraQuant®<br>Mustard           | Mustard | Sandwich<br>ELISA                             | 1 mg/kg                               | 60            | Romer Labs               |
|  | AgraStrip®<br>Mustard           | Mustard | Lateral Flow<br>Strip                         | 2 mg/kg                               | 11            | Romer Labs               |
|  | Mustard ELISA                   | Mustard | Sandwich<br>ELISA                             | 1 mg/kg                               | 60            | Immunolab                |
|  | Monotrace<br>Mustard ELISA      | Mustard | Sandwich<br>ELISA                             | LOD: 0.13 mg/kg LOQ: 1 mg/kg          | 40            | BioFront<br>Technologies |
|  | AlerTox Mustard<br>ELISA        | Mustard | Sandwich<br>ELISA                             | LOD: 1 mg/kg LOQ: 2 mg/kg             | Not<br>stated | Biomedal<br>Diagnostics  |



|  |               |         |                   |                            |     |                      |
|--|---------------|---------|-------------------|----------------------------|-----|----------------------|
|  | Mustard Check | Mustard | Sandwich<br>ELISA | LOD: <1 mg/kg LOQ: 2 mg/kg | 100 | BioCheck (UK)<br>Ltd |
|--|---------------|---------|-------------------|----------------------------|-----|----------------------|

**Table S4** Conventionally lab-based allergen detection methods and their smartphone-based counterparts

| <b>Conventional Method</b>                        | <b>Current Method</b>                                            | <b>Summary</b>                                                                                                                                                                                                                                                                                                                                                                                                                                                                                                                                                                                                                                                                                             |
|---------------------------------------------------|------------------------------------------------------------------|------------------------------------------------------------------------------------------------------------------------------------------------------------------------------------------------------------------------------------------------------------------------------------------------------------------------------------------------------------------------------------------------------------------------------------------------------------------------------------------------------------------------------------------------------------------------------------------------------------------------------------------------------------------------------------------------------------|
| ELISA with microplate reader as detector system   | ELISA with smartphone-based microplate reader as detector system | ELISA is a traditionally laboratory based routine allergen detection method, as it requires multiple reagent handling steps, sample extraction and detection from a UV-VIS microplate spectrophotometer. Microplate readers are expensive and non-portable, however using a smartphone as the microplate reader (see section 3.2.1) for detecting the colorimetric reaction makes the method more portable and accessible in low-resource settings.                                                                                                                                                                                                                                                        |
| Lateral flow immunoassay (LFIA) with strip reader | LFIA with smartphone reader                                      | LFIA is a rapid, portable, easy to use, safe and disposable screening method applied in food allergen analysis. LFIA qualitative optical detection is based on the appearance of 1 or 2 lines for absence/presence of allergens. To quantify LFIA results, conventionally a strip test reader is required which is a relatively expensive piece of equipment requiring training/instruction for use and a power source to operate. By using a smartphone as a LFIA reader (see section 3.1.2) quantitative/semi-quantitative results are achievable. Smartphones have the added benefits of being portable, affordable, easy to use and can connect wirelessly to deliver instant results to shareholders. |
| Flow cytometry                                    | Miniaturised flow cytometry                                      | Flow cytometry is a lab based immunoassay where antibodies of interest are immobilised onto different coloured microbeads, it has the benefit of being able to                                                                                                                                                                                                                                                                                                                                                                                                                                                                                                                                             |

|                                        |                             |                                                                                                                                                                                                                                                                                                                                                                                                                                                                                                                                                                                                                |
|----------------------------------------|-----------------------------|----------------------------------------------------------------------------------------------------------------------------------------------------------------------------------------------------------------------------------------------------------------------------------------------------------------------------------------------------------------------------------------------------------------------------------------------------------------------------------------------------------------------------------------------------------------------------------------------------------------|
|                                        |                             | <p>be easily multiplexed. The flow cytometer is a desk based instrument. Miniaturised flow cytometry (MFC) reduces the flow channels in the cytometer to microfluidic channels, reducing the overall size of the instrument. MFC is capable of being linked with a smartphone as the readout system (see section 3.3.1), this gives the method the ability to be portable and suitable for on-site detection of allergens, and data processing and results to be disseminated through a customised MFC app.</p>                                                                                                |
| <p>Surface plasmon resonance (SPR)</p> | <p>Smartphone based SPR</p> | <p>SPR is a traditionally lab based method which can detect changes in antibody/antigen binding on the gold surface of a sensor chip. SPR is able to detect multiple allergens, simultaneously in real time and monitor their binding responses in the form of a sensorgram. Smartphone based SPR can be achieved through a 3D printed optical attachment, the phone camera and a PDMS prism for light to be deflected from. By linking with a smartphone, SPR becomes a portable method which requires no analyte labelling, limited sample preparation steps and results which can be seen in real time.</p> |

## References

1. Raz SL, H. Norde, W. Bremer, MEGEG (2010) Food Allergen Profiling with an Image Plasmon Resonance-Based Biosensor *Anal Chem* 82 (20):8485-8491
2. Badran AA, Morais S, Maquieira Á (2017) Simultaneous determination of four food allergens using compact disc immunoassaying technology. *Anal Bioanal Chem* 409 (9):2261-2268. doi:10.1007/s00216-016-0170-0
3. Blais BW, Gaudreault M, Phillippe LM (2003) Multiplex enzyme immunoassay system for the simultaneous detection of multiple allergens in foods. *Food Control* 14 (1):43-47. doi:https://doi.org/10.1016/S0956-7135(02)00053-1
4. Weng X, Gaur G, Neethirajan S (2016) Rapid Detection of Food Allergens by Microfluidics ELISA-Based Optical Sensor. *Biosensors* 6 (2):24. doi:10.3390/bios6020024
5. Yman IM, Eriksson A, Johansson MA, Hellens K-E (2006) Food Allergen Detection with Biosensor Immunoassays. *J AOAC Int* 89 (3):856-861
6. Gomaa A, Boye J (2015) Simultaneous detection of multi-allergens in an incurred food matrix using ELISA, multiplex flow cytometry and liquid chromatography mass spectrometry (LC-MS). *Food Chem* 175:585-592. doi:https://doi.org/10.1016/j.foodchem.2014.12.017
7. Otto G, Lamote A, Deckers E, Dumont V, Delahaut P, Scippo M-L, Pleck J, Hillairet C, Gillard N (2016) A flow-cytometry-based method for detecting simultaneously five allergens in a complex food matrix. *J Food Sci Technol* 53 (12):4179-4186. doi:10.1007/s13197-016-2402-x
8. Cho CY, Nowatzke W, Oliver K, Garber EAE (2015) Multiplex detection of food allergens and gluten. *Anal Bioanal Chem* 407 (14):4195-4206. doi:10.1007/s00216-015-8645-y
9. Gomaa AR, S. Boye, J (2012) Detection of allergens in a multiple allergen matrix and study of the impact of thermal processing *Journal of Nutrition & Food Sciences* 9:1-6
10. Wang W, Li Y, Zhao F, Chen Y, Ge Y (2011) Optical thin-film biochips for multiplex detection of eight allergens in food. *Food Res Int* 44 (10):3229-3234. doi:https://doi.org/10.1016/j.foodres.2011.08.013
11. Tortajada-Genaro LS-F, S. Morais, S. Gabaldon. Puchades, R. Maquiera, A. (2012) Multiplex DNA detection of food allergens on a Digital Versatile Disk. *J Agric Food Chem* 60:36-43
12. Cheng F, Wu J, Zhang J, Pan A, Quan S, Zhang D, Kim H, Li X, Zhou S, Yang L (2016) Development and inter-laboratory transfer of a decaplex polymerase chain reaction assay combined with capillary electrophoresis for the simultaneous detection of ten food allergens. *Food Chem* 199:799-808. doi:https://doi.org/10.1016/j.foodchem.2015.12.058
13. Luber F, Demmel A, Pankofer K, Busch U, Engel K-H (2015) Simultaneous quantification of the food allergens soy bean, celery, white mustard and brown mustard via combination of tetraplex real-time PCR and standard addition. *Food Control* 47:246-253. doi:https://doi.org/10.1016/j.foodcont.2014.06.047
14. Waiblinger H-U, Boernsen B, Geppert C, Demmel A, Peterseil V, Koeppel R (2017) Ring trial validation of single and multiplex real-time PCR methods for the detection and quantification of the allergenic food ingredients mustard, celery, soy, wheat and rye. *J Verbrauch Lebensm* 12 (1):55-72. doi:10.1007/s00003-016-1063-z
15. Waiblinger H-UB, B. Naumann, G. Koeppel, R. (2014) Ring trial validation of single and multiplex real-time PCR methods for the detection and quantification of the allergenic food ingredients sesame, almond, lupine and Brazil nut. *J Verbrauch Lebensm* 9:297-310

16. Wu JC, L. Lin, D. Ma, Zhaocheng. Deng, X. (2016) Development and Application of a Multiplex Real Time PCR Assay as an Indicator of Potential Allergenicity in Citrus Fruits. *J Agric Food Chem* 64 (47):9089-9098
17. Pafundo S, Gulli M, Marmioli N (2010) Multiplex real-time PCR using SYBR® GreenER™ for the detection of DNA allergens in food. *Anal Bioanal Chem* 396 (5):1831-1839. doi:10.1007/s00216-009-3419-z
18. Hubalkova Z, Rencova E (2011) One-step multiplex PCR method for the determination of pecan and Brazil nut allergens in food products. *J Sci Food Agric* 91 (13):2407-2411. doi:10.1002/jsfa.4479
19. López-Calleja IM, García A, Madrid R, García T, Martín R, González I (2017) Multiplex ligation-dependent probe amplification (MLPA) for simultaneous detection of DNA from sunflower, poppy, flaxseed, sesame and soy allergenic ingredients in commercial food products. *Food Control* 71:301-310. doi:https://doi.org/10.1016/j.foodcont.2016.06.014
20. Mustorp SD, SM. Holck, AL. (2011) Multiplex, Quantitative, Ligation-Dependent Probe Amplification for Determination of Allergens in Food. *J Agric Food Chem* 59:5231-5239
21. Ehlert AD, A. Hupfer, C. Busch, U. Engel, KH. (2009) Simultaneous detection of DNA from 10 food allergens by ligation-dependent probe amplification. *Food Additives & Contaminants: Part A* 26 (4):409-418. doi:10.1080/02652030802593529
22. Unterberger C, Lubert F, Demmel A, Grünwald K, Huber I, Engel K-H, Busch U (2014) Simultaneous detection of allergenic fish, cephalopods and shellfish in food by multiplex ligation-dependent probe amplification. *Eur Food Res Technol* 239 (4):559-566. doi:10.1007/s00217-014-2251-7
23. Ng E, Nadeau KC, Wang SX (2016) Giant magnetoresistive sensor array for sensitive and specific multiplexed food allergen detection. *Biosens Bioelectron* 80:359-365. doi:https://doi.org/10.1016/j.bios.2016.02.002
